# Supplementary material
Source: MDPI journal article supplement (https://www.mdpi.com/2072-4292/14/3/584)
Supplement: s1 [file s1]

## Supporting Information

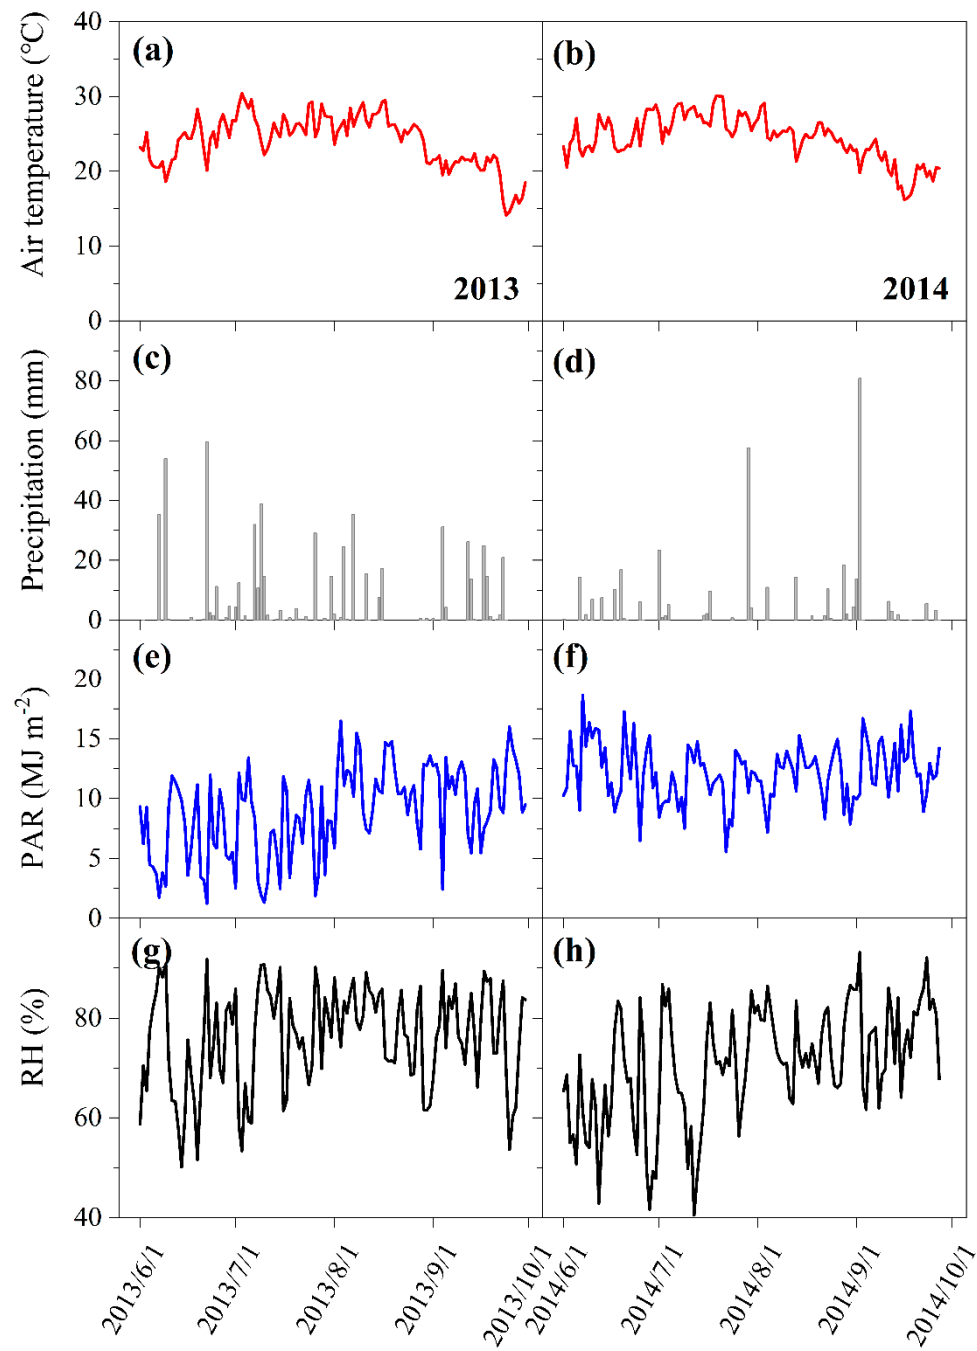

**Figure S1.** Time series of air temperature (a,b), precipitation (c,d), photosynthetically active radiation (e,f), and relative humidity (g,h) during the 2013–2014 growing seasons.

**Table S1.** The mean values of LAI, CWC, VWC and spectral vegetation indices during soil drying under different irrigation treatments in the 2013 and 2014 growing seasons

| Year | Treatments | LAI           | CWC           | VWC           | WI            | NDWI           | NDII           | NDVI          | OSAVI         |
|------|------------|---------------|---------------|---------------|---------------|----------------|----------------|---------------|---------------|
| 2013 | T1         | 1.501 ± 0.212 | 0.255 ± 0.036 | 1.154 ± 0.219 | 1.044 ± 0.010 | 0.024 ± 0.015  | 0.169 ± 0.033  | 0.663 ± 0.043 | 0.520 ± 0.033 |
|      | T2         | 1.376 ± 0.209 | 0.222 ± 0.034 | 0.913 ± 0.182 | 1.034 ± 0.008 | 0.009 ± 0.012  | 0.164 ± 0.030  | 0.689 ± 0.039 | 0.553 ± 0.033 |
|      | T3         | 1.193 ± 0.167 | 0.207 ± 0.030 | 0.864 ± 0.174 | 1.025 ± 0.007 | -0.004 ± 0.012 | 0.123 ± 0.029  | 0.618 ± 0.040 | 0.501 ± 0.034 |
|      | T4         | 1.112 ± 0.158 | 0.178 ± 0.025 | 0.870 ± 0.182 | 1.026 ± 0.007 | -0.001 ± 0.010 | 0.125 ± 0.025  | 0.623 ± 0.034 | 0.502 ± 0.028 |
|      | T5         | 0.919 ± 0.155 | 0.126 ± 0.022 | 0.496 ± 0.131 | 1.015 ± 0.007 | -0.016 ± 0.009 | 0.078 ± 0.022  | 0.550 ± 0.030 | 0.452 ± 0.023 |
| 2014 | W1         | 1.122 ± 0.161 | 0.165 ± 0.022 | 0.575 ± 0.102 | 1.012 ± 0.007 | -0.023 ± 0.010 | 0.073 ± 0.022  | 0.538 ± 0.028 | 0.440 ± 0.024 |
|      | W2         | 1.105 ± 0.145 | 0.158 ± 0.020 | 0.566 ± 0.098 | 1.011 ± 0.007 | -0.024 ± 0.009 | 0.076 ± 0.023  | 0.522 ± 0.028 | 0.433 ± 0.022 |
|      | W3         | 0.820 ± 0.127 | 0.111 ± 0.015 | 0.275 ± 0.044 | 0.991 ± 0.005 | -0.050 ± 0.007 | 0.002 ± 0.017  | 0.400 ± 0.019 | 0.333 ± 0.015 |
|      | W4         | 0.517 ± 0.091 | 0.072 ± 0.012 | 0.162 ± 0.030 | 0.971 ± 0.003 | -0.082 ± 0.004 | -0.088 ± 0.010 | 0.264 ± 0.013 | 0.227 ± 0.011 |
|      | W5         | 0.424 ± 0.079 | 0.058 ± 0.010 | 0.121 ± 0.024 | 0.962 ± 0.003 | -0.096 ± 0.006 | -0.119 ± 0.009 | 0.196 ± 0.011 | 0.167 ± 0.008 |

Mean ± SE. LAI, leaf area index; CWC, canopy water content ( $\text{kg m}^{-2}$ ); VWC, vegetation water content ( $\text{kg m}^{-2}$ ); WI, water index; NDWI, normalized difference water index; NDII, normalized difference infrared index; NDVI, normalized difference vegetation index; OSAVI, optimal soil-adjusted vegetation index.
